# Supplementary material for: The TMEM106B T186S coding variant increases neurite arborization and synaptic density in primary hippocampal neurons
Source: Front Neurosci. 2023 Oct 13;17:1275959. doi: 10.3389/fnins.2023.1275959 (PMC10603297; doi:10.3389/fnins.2023.1275959)
Supplement: Supplementary file 1 [file Table_1.XLSX]

## Sheet: DEGS_KIvWT
GeneID	logFC	Pvalue
Grn	-0.188497	2.169e-05
Ppp2ca	0.0787601	0.00026327
Mcoln1	-0.185265	0.00258906
Gnb5	0.14649	0.00373553
Syt4	-0.133998	0.00436399
Pde4d	-0.208637	0.00456047
Gns	-0.121679	0.00516491
Slc1a3	-0.139821	0.00519616
Slc4a10	-0.126499	0.00534
Sp1	-0.235637	0.00547208
Adrb2	-0.539183	0.00655362
Cab39	-0.154496	0.00758314
Nsf	-0.0785558	0.00852603
Trf	0.36889	0.00855105
Pllp	0.276765	0.00991501
Adcy8	-0.219338	0.0100778
Acaa1a	0.209354	0.0110692
Fa2h	0.339056	0.0116511
Gabrb3	-0.218681	0.0123662
Mapk8	-0.164065	0.0124071
Egr1	-0.290367	0.0125991
Nefh	0.159595	0.013016
Ermn	0.232305	0.0131142
Prkaca	-0.139584	0.0132298
Dgkb	0.216295	0.0132572
Cln8	-0.140084	0.0135389
Amph	-0.178319	0.0139875
Ncl	-0.180927	0.0152148
Gria4	-0.14903	0.0163884
Olfm3	0.166062	0.0164436
Fyn	-0.103595	0.0185399
Psen2	-0.217066	0.0186441
Pls1	0.184378	0.0204363
Mag	0.24332	0.020781
Chl1	-0.158577	0.0211007
Tnc	-0.35862	0.0214079
Mal	0.332505	0.024698
Aspa	0.2255	0.0249173
Sec23a	-0.0724887	0.0251178
Stat3	-0.25723	0.0261963
Ctnnb1	-0.180797	0.0285532
Gpr37	0.203649	0.0287216
Aars	-0.0851933	0.0292435
Rac1	-0.224029	0.0292646
L1cam	-0.124495	0.0294492
Cdk5r1	-0.0663265	0.0295629
Gjb1	0.347377	0.02996
Ager	-0.766986	0.0302837
Fcrls	0.225994	0.0305227
Cd44	-0.399128	0.0323703
Fam104a	-0.0776561	0.0333141
Apaf1	-0.174563	0.0339763
Epha3	-0.392209	0.0353148
Pcsk2	-0.157994	0.035315
Sorcs3	0.14857	0.0356234
Stx4a	-0.0669982	0.0364664
Bax	-0.259155	0.0367042
Gria2	-0.073124	0.0372329
Atp6v0c	-0.125916	0.0373965
Syt1	0.266061	0.0390568
Clu	0.0848291	0.0395388
Gnai1	-0.078124	0.0395912
Plcb3	0.217384	0.039879
Xab2	-0.105801	0.039954
Trem1	-1.04403	0.0411076
Lsm7	0.0895466	0.0414888
Msn	-0.176498	0.0426323
Sf3b4	0.258016	0.0433641
Prkcb	0.120974	0.0435284
Inpp5f	0.135317	0.0436863
Egr2	-0.708855	0.0458743
Cxcr4	-0.472834	0.0464707
Slc9a6	-0.128037	0.0465486
Pdpk1	0.115346	0.0465765
Txnl1	0.131571	0.0467652
Prkaa2	-0.215757	0.0468758
Epha5	-0.149852	0.0469404
Neu1	-0.10743	0.0471744
Calb2	-0.52303	0.0475888
Hexb	-0.192638	0.0477791
Notch1	-0.125993	0.0484038
Pla2g2e	-1.1652	0.0487744
Epha6	-0.156074	0.0493726
Src	-0.127439	0.0497038

## Sheet: DEGs_KOvWT
Probe Name	logFC	P value
Cdkn1a	-0.447491	2.586e-05
Ube2n	-0.118862	0.00029903
Ugt8a	-0.30147	0.00036276
Mal	-0.342446	0.00112617
Gdpd2	-0.671093	0.00557548
Epo	0.813988	0.00586704
Trf	-0.305211	0.005892
Tardbp	-0.161407	0.00594229
Napsa	0.630129	0.00608736
Cx3cl1	-0.112284	0.00987907
Tnc	-0.290181	0.0106587
Ntng1	-0.211745	0.0118586
Plxnb3	-0.256693	0.0123389
Lclat1	-0.0986743	0.0145631
Mbp	-0.237725	0.0162887
Bcas1	-0.218138	0.0165921
Cntnap1	0.149912	0.0197974
Chrna7	-0.095616	0.0221575
Gnptab	-0.163541	0.0262816
Cln8	-0.12995	0.0264366
Pkn1	-0.255372	0.0270915
Notch3	-0.388436	0.027114
Mecp2	-0.0989266	0.0272941
Chrnb2	-0.157096	0.0273729
Cnp	-0.155024	0.0278055
Mog	-0.178362	0.0279516
Nelfa	-0.234658	0.0284343
Plp1	-0.205072	0.0293277
Map2k2	-0.15285	0.0294828
Sart1	-0.198406	0.0296769
Rasgrp1	-0.0777951	0.0303529
Ddit3	-0.155402	0.0308314
Rhoa	-0.0570247	0.0342794
Cldn11	-0.157215	0.0343944
Zfp24	-0.252994	0.0344192
Lamb2	-0.260213	0.0345328
Mag	-0.265675	0.0348142
Egr2	-0.541647	0.0357786
Gpr37	-0.135855	0.0452543
Casp1	0.396208	0.0469115
Icam2	-0.330786	0.047507
Plcb1	-0.0848766	0.0481573
